# Supplementary material for: Sampling and Analysing Spatial Determinants of Undernutrition in Northern Rwanda – A Multidisciplinary Approach
Source: Research Square preprint supplement (doi:10.21203/rs.3.rs-4751165/v1), 2025-03-21
Supplement: Supplementary file 1 [file d191e41208baa95cae018031.docx]

**Supplementary Material 1**

1. **Summary statistics for multivariable logistics regression (selected variables)**

Table 1 Summary statistics for the logistic regression

|  | **Selected variables** | **Odds Ratio** | **95% Confidence Interval** | | **P-value** |
| --- | --- | --- | --- | --- | --- |
| 1 | Age of the child | 2.47 | 1.63 | 3.74 | 0.00 |
| 2 | Birthweight | 0.76 | 0.57 | 1.00 | 0.05 |
| 3 | Underweight status | 0.37 | 0.27 | 0.51 | 0.00 |
| 4 | Child is still breastfeeding | 1.01 | 0.72 | 1.42 | 0.95 |
| 5 | Child sex (male) | 1.36 | 1.04 | 1.77 | 0.02 |
| 6 | Number of days, child was left alone more than 15 minutes | 0.76 | 0.56 | 1.02 | 0.06 |
| 7 | Number of days, child was left with another child | 0.85 | 0.63 | 1.15 | 0.29 |
| 8 | Minimum Dietary Diversity score | 1.19 | 0.85 | 1.67 | 0.31 |
| 9 | BMI of the mother | 1.15 | 0.87 | 1.53 | 0.32 |
| 10 | Mother’s total years in school/university | 1.20 | 0.90 | 1.66 | 0.20 |
| 11 | Number of children mother gave birth to | 1.20 | 0.91 | 1.596 | 0.20 |
| 12 | Giving birth at a health centre | 0.76 | 0.59 | 0.99 | 0.04 |
| 13 | Lack of a friend to assist the mother when ill | 1.44 | 1.09 | 1.92 | 0.01 |
| 14 | Lack of help or guidance in problems | 0.87 | 0.65 | 1.16 | 0.33 |
| 15 | The mother’s decision-making autonomy in major household purchases | 1.29 | 1.02 | 1.63 | 0.03 |
| 16 | Household without access to electricity | 1.52 | 1.15 | 2.03 | 0.00 |
| 17 | Household with inconsistent handwashing practices | 1.34 | 1.03 | 1.73 | 0.02 |
| 18 | Household food insecurity access scale | 1.04 | 0.76 | 1.41 | 0.81 |
| 19 | Household with no milk consumption | 1.13 | 0.84 | 1.52 | 0.43 |
| 20 | Households without a home garden | 1.41 | 1.08 | 1.85 | 0.01 |
| 21 | Distance to closest health facility | 1.13 | 0.86 | 1.47 | 0.39 |
| 22 | Distance to closest main roads | 1.17 | 0.88 | 1.55 | 0.29 |
| 23 | Distance to closest markets | 1.16 | 0.89 | 1.51 | 0.28 |
| 24 | Mean annual temperature | 0.76 | 0.49 | 1.18 | 0.22 |
| 25 | Elevation | 1.10 | 0.73 | 1.63 | 0.66 |
| 26 | Mean annual rainfall | 0.87 | 0.64 | 1.19 | 0.39 |

1. **Geographically weighted logistic regression**

Table 2 Summary statistics for the geographically weighted logistic regression parameter estimates

|  | **Selected variables** | **Mean** | **STD** | **Min** | **Median** | **Max** |
| --- | --- | --- | --- | --- | --- | --- |
| 1 | Age of the child | 0.939 | 0.073 | 0.797 | 0.948 | 1.096 |
| 2 | Birthweight | -0.327 | 0.044 | -0.49 | -0.324 | -0.245 |
| 3 | Underweight status | -0.98 | 0.121 | -1.186 | -0.949 | -0.846 |
| 4 | Child is still breastfeeding | 0.047 | 0.048 | -0.044 | 0.074 | 0.153 |
| 5 | Child sex (male) | 0.329 | 0.044 | 0.273 | 0.316 | 0.471 |
| 6 | Number of days, child was left alone more than 15 minutes | -0.297 | 0.092 | -0.434 | -0.308 | -0.147 |
| 7 | Number of days, child was left with another child | -0.163 | 0.063 | -0.271 | -0.155 | -0.069 |
| 8 | Minimum Dietary Diversity score | 0.17 | 0.014 | 0.117 | 0.174 | 0.19 |
| 9 | BMI of the mother | 0.129 | 0.076 | -0.005 | 0.135 | 0.222 |
| 10 | Mother’s total years in school/university | 0.124 | 0.042 | 0.047 | 0.116 | 0.204 |
| 11 | Number of children mother gave birth to | 0.145 | 0.039 | 0.012 | 0.154 | 0.199 |
| 12 | Giving birth at a health centre | -0.266 | 0.064 | -0.384 | -0.251 | -0.189 |
| 13 | Lack of a friend to assist the mother when ill | 0.369 | 0.048 | 0.209 | 0.376 | 0.445 |
| 14 | Lack of help or guidance in problems | -0.108 | 0.048 | -0.193 | -0.103 | -0.04 |
| 15 | The mother’s decision-making autonomy in major household purchases | 0.246 | 0.042 | 0.157 | 0.24 | 0.322 |
| 16 | Household without access to electricity | 0.44 | 0.043 | 0.325 | 0.425 | 0.508 |
| 17 | Household with inconsistent handwashing practices | 0.239 | 0.041 | 0.189 | 0.218 | 0.339 |
| 18 | Household food insecurity access scale | 0.048 | 0.082 | -0.074 | 0.036 | 0.167 |
| 19 | Household with no milk consumption | 0.081 | 0.103 | -0.171 | 0.085 | 0.246 |
| 20 | Households without a home garden | 0.334 | 0.022 | 0.298 | 0.33 | 0.387 |
| 21 | Distance to closest health facility | 0.118 | 0.036 | 0.072 | 0.107 | 0.183 |
| 22 | Distance to closest main roads | 0.119 | 0.031 | 0.046 | 0.12 | 0.183 |
| 23 | Distance to closest markets | 0.124 | 0.055 | -0.033 | 0.126 | 0.222 |
| 24 | Mean annual temperature | -0.311 | 0.064 | -0.419 | -0.317 | -0.2 |
| 25 | Elevation | 0.078 | 0.074 | -0.037 | 0.075 | 0.194 |
| 26 | Mean annual rainfall | -0.119 | 0.086 | -0.294 | -0.085 | 0.037 |
